# Supplementary material
Source: Springer Nature journal article supplement (https://www.springermedizin.de/resource/supplementary/12950_2012_240_MOESM1_ESM.pdf/9558272)

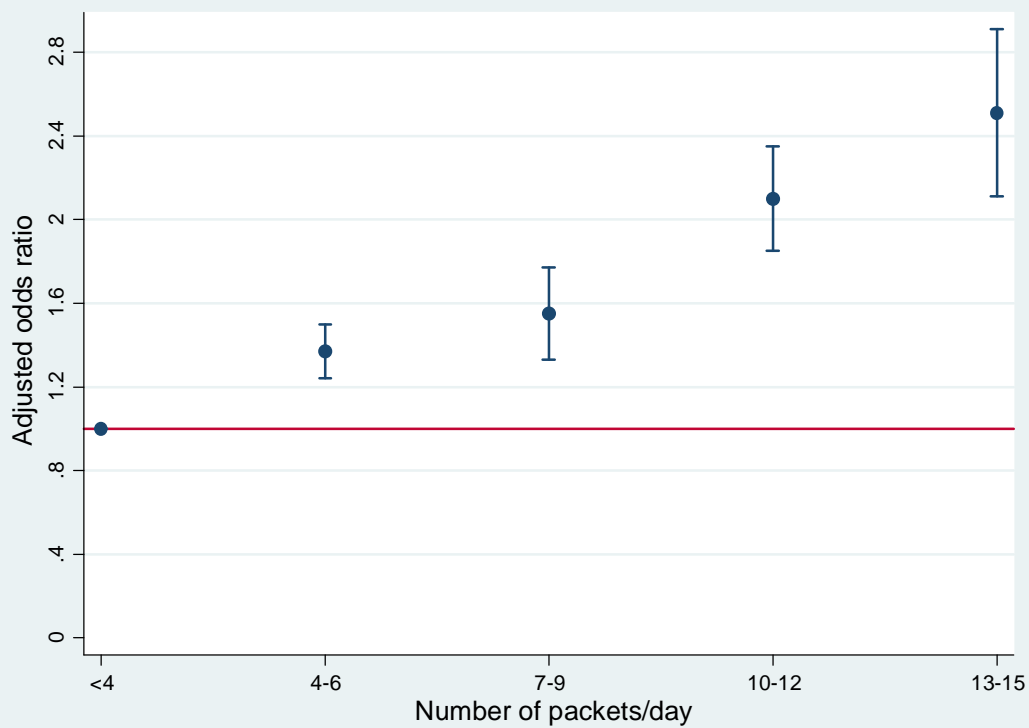

Supplement: MOESM1 [file 9558272]
